# Supplementary material for: Perceptions of Academic Staff, Teaching Methods, and Ethics at Umm Al-Qura University: A Cross-Sectional Study
Source: Research Square preprint supplement (doi:10.21203/rs.3.rs-6751336/v1), 2025-06-17
Supplement: Supplementary file 1 [file 65dd78ae79f9003aaa3b6127.pdf]

**Survey Title: Perceptions of Academic Staff, Teaching Methods, and Ethics at Umm Al-Qura University: A Cross-Sectional Study**

**Informed Consent**

Dear Participant,

You are invited to take part in a research study titled "*Perceptions of Academic Staff, Teaching Methods, and Ethics at Umm Al-Qura University.*" The purpose of this study is to explore pharmacy students' views on teaching quality, faculty ethics, and instructional methods.

Participation is completely voluntary. Your responses will be anonymous and treated with strict confidentiality. There are no known risks or direct benefits associated with your participation. You may skip any question or withdraw from the study at any time without any consequences.

By clicking "Next" or proceeding with the questionnaire, you confirm that you are a pharmacy student in your third year or above, that you have read and understood the information above, and that you voluntarily agree to participate in this study.

Thank you for your time and contribution.

**Section 1: Demographic Information**

1. What is your current academic year?
  - Third Year
  - Fourth Year
  - Fifth Year
  - Sixth Year (Internship)
2. What is your gender?
  - Male
  - Female
3. What was your primary motivation for choosing pharmacy as a field of study?
  - Personal interest in healthcare
  - Family influence
  - Better job opportunities
  - Prestige and respect in society

**Section 2: Perceptions of Teaching Staff**

4. How would you rate the overall teaching quality of faculty members in your college?
- Excellent
  - Good
  - Average
  - Poor
  - Very Poor
5. Which aspect do you think is most important in an academic teacher? (Select one)
- Subject knowledge and expertise
  - Teaching style and clarity in explanation
  - Friendliness and supportiveness
  - Ability to engage and motivate students
  - Fairness in grading and assessment
6. Do you think academic teachers should provide extra marks to students without assessing their knowledge or effort?
- Strongly Agree
  - Agree
  - Neutral
  - Disagree
  - Strongly Disagree
7. What do you think is the most effective way for faculty members to evaluate students' knowledge? (Select one)
- Exams and quizzes
  - Assignments and reports
  - Presentations and discussions
  - Practical and lab work
  - Continuous assessment (combination of all)

### **Section 3: Teaching Preferences and Learning Styles**

8. Which teaching method do you find most effective for understanding complex topics? (Select one)
- Lectures with PowerPoint slides
  - Videos and multimedia presentations
  - Case studies and real-world examples
  - Hands-on practical sessions in labs
  - Group discussions and interactive activities
9. Do you prefer academic lectures to be more focused on:
- Theoretical concepts only
  - Practical applications only
  - A balance of theory and practical applications

10. How do you feel about faculty members who use innovative teaching methods (e.g., flipped classrooms, interactive apps, simulation models)?
- Very Effective
  - Somewhat Effective
  - Neutral
  - Not Effective
11. In your opinion, how important is it for academic faculty to integrate real-world pharmacy applications into lectures?
- Very Important
  - Important
  - Neutral
  - Not Important
12. Do you think moral values and ethics of the faculty members affect your ability to learn from them?
- Strongly Agree
  - Agree
  - Neutral
  - Disagree
  - Strongly Disagree

#### **Section 4: Expectations and Future Improvements**

13. What do you expect most from your academic teaching staff? (Select up to two)
- Clear and structured explanations
  - More real-life case studies and applications
  - More interactive sessions and discussions
  - More flexibility and support for students
  - Stricter and more disciplined teaching
14. Do you believe that student feedback on teaching quality should influence faculty promotions and evaluations?
- Strongly Agree
  - Agree
  - Neutral
  - Disagree
  - Strongly Disagree
15. How would you rate the effectiveness of faculty members in preparing students for real-world pharmacy practice?
- Excellent
  - Good
  - Average

Poor

Very Poor

**Section 5: Open-Ended Questions**

16. What is one teaching practice you find highly effective and would like to see more of?

17. What is one aspect of teaching that you strongly dislike or think should be improved?

18. Any additional comments or suggestions for improving academic teaching in the College of Pharmacy?
